# Supplementary material for: VEGF-A controls the expression of its regulator of angiogenic functions, dopamine D2 receptor, on endothelial cells
Source: Oxford University Press journal article supplement (doi:10.1242/jcs.259617), 2022-05-20
Supplement: jcs259617supp.pdf [file jcs259617supp.pdf]

```
GAAGCCGGGCTCATGGACGGGTGAGGCGGCGGTGTGCGCAGACAGTGCTCCAGCCGCGCGCTCCCCAGGCC  
TGGCCCCGGCCTCGGGCCGGGAGGAAGAGTAGCTCGCCGAGGCGCCGAGGAGAGCGGGCCGCCACAGCCC  
GAGCCGAGAGGGAGCGCGAGCCGCGCCGCCGCCCGGTGGGCTCCGAAACCATGAACCTTCTGCTGTCTTGGG  
TG↓CATTGGAGCCTTGCTTGTCTACCTCCACCATGC↓CAAGGTAAGCGGTCTGTGCCCTGCTGGCGCCGCG  
GGCCGCTGCGAGCGCTCTCCCGGCTGGGACGTGCGTGCAGCGCGCGTGGGGGCTCCGTGCCCCACGCGG  
GTCCATGGGACACAGGCGTGGGCGTCCCCCTCTGTCGTCTTAGG
```

**Fig. S1.** PCR sequence (wild type) and the cutting edge used for the knockdown of VEGF-A in HT29 cells. PCR primers; hVEGF-A exon 1; start codon; gRNA g3; gRNA g7; ↓ gRNA cutting site.

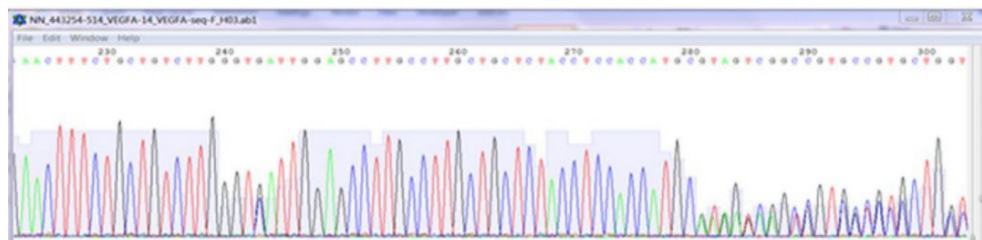

**Fig. S2.** PCR genotyping data of HT29 hVEGF-A (-/-) human colon cancer cell line clone.

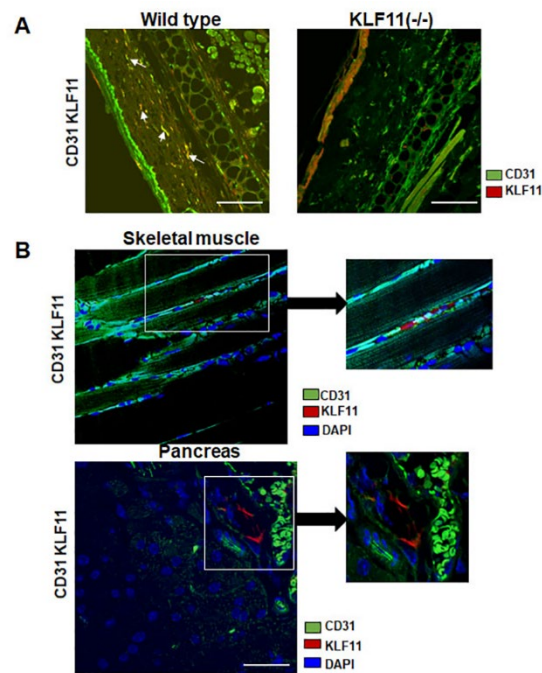

**Fig. S3 (A and B).** (A) Confocal images (arrows) show colocalization of KLF11 and CD31, i.e., expression of KLF11 in the endothelial cells of ears in wild type (KLF11  $^{+/+}$ ) C57/B16 mice. In contrast, there are no expressions of KLF11 in endothelial cells of ears in KLF11  $(^{-/-})$  C57/B16 mice (Scale Bar 40  $\mu\text{m}$ ). (B) KLF11 expression is specifically absent in CD31 positive endothelial cells in KLF11 expressing skeletal muscle and pancreas collected from endothelial cell-specific KLF11  $(^{-/-})$  mice (Scale Bar 40  $\mu\text{m}$ ).

**Fig S4. Blot transparency.**

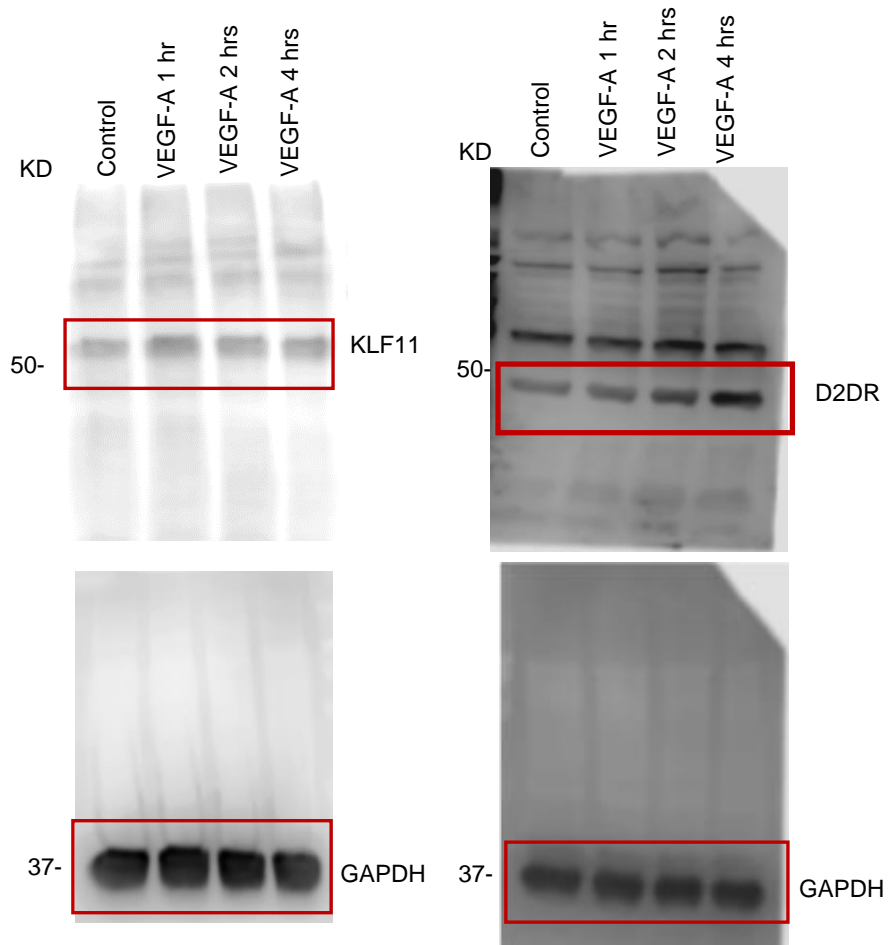

Full unedited gels for Figure 4B

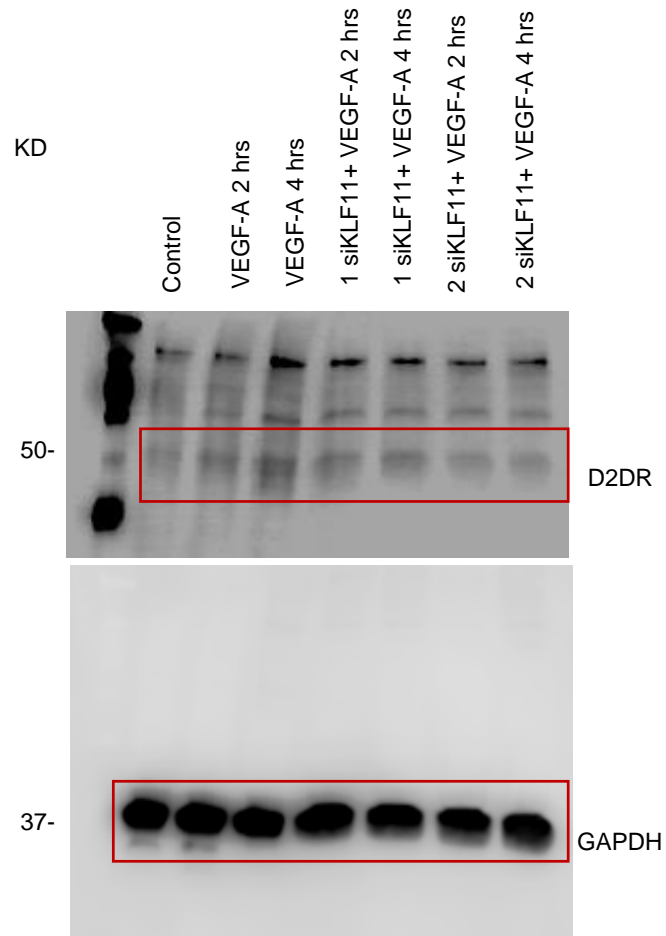

Full unedited gels for Figure 4C

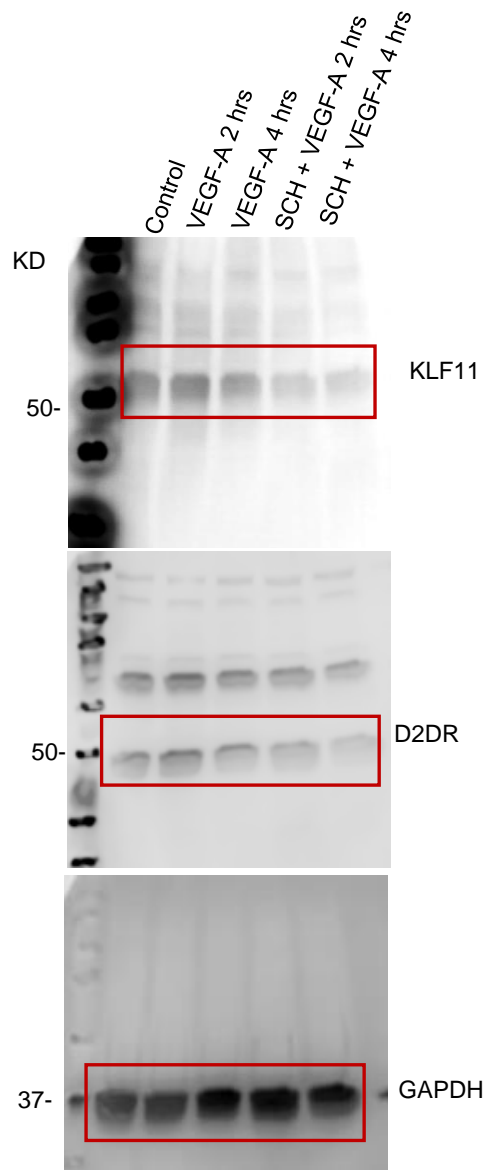

Full unedited gels for Figure 5B

**Table S1.** Primers used for generation of the KLF11 shRNA knockin mice

| Primers     | Sequence                                |
|-------------|-----------------------------------------|
| PR425N      | 5' - GGTGATAGGTGGCAAGTGGTATTCCGTAAG -3' |
| PR436N-1    | 5' - ATCAACTACCGCCACCTCGACC -3'         |
| KLF-R1      | 5' - CTACTTCCATTTGTCACGTCCTGCACG -3'    |
| KLF-R2      | 5' - CTAGAGCGGCCGATGAGTT -3'            |
| KLF STOP5-F | 5' - GAAGCGGGTAGGCCTTTGG -3'            |
| KLF STOP5-R | 5' - TAGCCGAATAGCCTCTCCACC -3'          |
| KLF-F       | 5' - GACAGCACAAAAGGAAACTCACCCCTAAC -3'  |
| PR522N      | 5' - GACGATGTAGGTCACGGTCTCGAAG -3'      |
| Frt-R1      | 5' - GGAATAGGAACTTCGTCGACA -3'          |
| Frt-R2      | 5' - CCGCGAAGTTCCTATACCTTTTG -3'        |
| R10N        | 5' - AGTTCTCTGCTGCCTCCTGGCTTCT -3'      |
| R13         | 5' - CATAAACCCAGATGACTCCTATCCTC-3'      |
